# Supplementary material
Source: HighWire-hosted journal article supplement (https://cmaj.ca/highwire/filestream/59678/field_highwire_adjunct_files/5/151179-view-6-at.pdf)
Supplement: 151179-view-6-at.pdf [file 151179-view-6-at.pdf]

**Appendix 6 (as supplied by the authors): Ancillary therapies and failed neuroprotection trials in Parkinson disease**

| Failed neuroprotection trials                                                                                                                                                                                                                                                                                                                                                                                                                                                                                                                                      | Therapies with insufficient data                                                                                                                                                                                                                                                                                                                                                                                                                                                                                                                                                                                                                                                                                                                                   |
|--------------------------------------------------------------------------------------------------------------------------------------------------------------------------------------------------------------------------------------------------------------------------------------------------------------------------------------------------------------------------------------------------------------------------------------------------------------------------------------------------------------------------------------------------------------------|--------------------------------------------------------------------------------------------------------------------------------------------------------------------------------------------------------------------------------------------------------------------------------------------------------------------------------------------------------------------------------------------------------------------------------------------------------------------------------------------------------------------------------------------------------------------------------------------------------------------------------------------------------------------------------------------------------------------------------------------------------------------|
| <ul style="list-style-type: none"> <li>• creatine<sup>1</sup></li> <li>• rasagiline<sup>2</sup></li> <li>• amantadine<sup>3</sup></li> <li>• pramipexole<sup>4</sup></li> <li>• ropinirole<sup>5</sup></li> <li>• selegiline<sup>6,7</sup></li> <li>• thalamotomy<sup>8</sup></li> <li>• riluzole<sup>9</sup>, NADH, Melatonin, CEP-1347<sup>8,10</sup></li> <li>• CoQ10<sup>11</sup></li> <li>• Vitamin E<sup>12</sup></li> <li>• antihypertensive drugs<sup>13</sup></li> <li>• statins<sup>14</sup></li> <li>• cell-based therapies.<sup>15,16</sup></li> </ul> | <ul style="list-style-type: none"> <li>• Exercise therapy may be considered to improve motor function in patients with PD.<sup>8,17,18</sup></li> <li>• There is good evidence for physiotherapy (PT), but the effect often dissipates when intervention stops.<sup>17,19</sup></li> <li>• Speech therapy may be considered to improve speech volume<sup>20</sup></li> <li>• Occupational therapy should be employed for practical home issues, and may be helpful with driving assessments.<sup>17</sup></li> <li>• Ibuprofen<sup>21</sup></li> <li>• Vitamin C, folic or folinic acid.<sup>8,22</sup></li> <li>• <i>Mucunapruriens</i> plant extract; contains levodopa; not adequately regulated, lacks chronic benefit and safety data.<sup>8</sup></li> </ul> |

References

1. Kieburtz K, Tilley BC, Elm JJ, et al. Effect of Creatine Monohydrate on Clinical Progression in Patients With Parkinson Disease. *Jama*. 2015;313(6):584.
2. Olanow CW, Rascol O, Hauser R, et al. A double-blind, delayed-start trial of rasagiline in Parkinson's disease. *N Engl J Med*. 2009;361(13):1268-1278.
3. Uitti RJ, Rajput AH, Ahlskog JE, et al. Amantadine treatment is an independent predictor of improved survival in Parkinson's disease. *Neurology*. 1996;46(6):1551-1556.
4. The Parkinson Study Group. Pramipexole vs levodopa as initial treatment for Parkinson disease: A randomized controlled trial. Parkinson Study Group. *JAMA*.
5. Rakshi JS, Pavese N, Uema T, et al. A comparison of the progression of early Parkinson's disease in patients started on ropinirole or L-dopa: An 18F-dopa PET study. *J Neural Transm*. 2002;109(12):1433-1443.
6. Effect of deprenyl on the progression of disability in early Parkinson's disease. The Parkinson Study Group. *N Engl J Med*. 1989;321(20):1364-1371.
7. Golbe LI, Langston JW, Shoulson I. Selegiline and Parkinson's disease. Protective and symptomatic considerations. *Drugs*. 1990;39(5):646-651.
8. Suchowersky O, Gronseth G, Perlmutter J, Reich S, Zesiewicz T, Weiner WJ. Practice parameter: Neuroprotective strategies and alternative therapies for Parkinson disease (an evidence-based review): Report of the Quality Standards Subcommittee of the American

- Academy of Neurology. *Neurology*. 2006;66(7):976-982.
9. Jankovic J, Hunter C. A double-blind, placebo-controlled and longitudinal study of riluzole in early Parkinson's disease. *Parkinsonism Relat Disord*. 2002;8(4):271-276.
  10. Wang L, Johnson E. Mixed Lineage Kinase Inhibitor Cep- 1347 Fails To Delay Disability in Early Parkinson Disease. *Neurology*. 2008;71(6):462-463.
  11. Beal MF, Oakes D, Shoulson I, et al. A randomized clinical trial of high-dosage coenzyme Q10 in early Parkinson disease: no evidence of benefit. *JAMA Neurol*. 2014;71(5):543-552.
  12. The Parkinson Study Group. Effects of Tocopherol and Deprenyl on the Progression of Disability in Early Parkinson's Disease. *N Engl J Med*. 1993;328(3):176-183.
  13. Rees K, Stowe R, Patel S, et al. Anti-hypertensive drugs as disease-modifying agents for Parkinson's disease: evidence from observational studies and clinical trials. *Cochrane Database Syst Rev*. 2011;(1469-493X (Electronic)):CD008535.
  14. Huang X, Alonso A, Guo X, et al. Statins, plasma cholesterol, and risk of Parkinson's disease: A prospective study. *Mov Disord*. 2015;30(4):552-559.
  15. Olanow CW, Goetz CG, Kordower JH, et al. A double-blind controlled trial of bilateral fetal nigral transplantation in Parkinson's disease. *Ann Neurol*. 2003;54(3):403-414.
  16. Kordower JH, Goetz CG, Freeman TB, Olanow CW. Dopaminergic transplants in patients with Parkinson's disease: neuroanatomical correlates of clinical recovery. *Exp Neurol*. 1997;144(1):41-46.
  17. Bloem BR, de Vries NM, Ebersbach G. Nonpharmacological treatments for patients with Parkinson's disease. *Mov Disord*. 2015;30(11):1504-1520.
  18. Canning CG, Sherrington C, Lord SR, et al. Exercise for falls prevention in Parkinson disease A randomized controlled trial. 2014;84(3):304-312.
  19. Deane KH, Jones D, Playford ED, Ben-Shlomo Y, Clarke CE. Physiotherapy for patients with Parkinson's Disease: a comparison of techniques. *Cochrane database Syst Rev*. 2001;(3):CD002817. doi:10.1002/14651858.CD002817.
  20. Mahler LA, Ramig LO, Fox C. Evidence-based treatment of voice and speech disorders in Parkinson disease. *Curr Opin Otolaryngol Head Neck Surg*. 2015;23(3):209-215.
  21. Rees K, Stowe R, Patel S, et al. Non-steroidal anti-inflammatory drugs as disease-modifying agents for Parkinson's disease: evidence from observational studies. In: Rees K, ed. *Cochrane Database of Systematic Reviews*. Vol Chichester, UK: John Wiley & Sons, Ltd; 2011:CD008535. doi:10.1002/14651858.CD008454.pub2.
  22. Etminan M, Gill SS, Samii A. Intake of vitamin E, vitamin C, and carotenoids and the risk of Parkinson's disease: A meta-analysis. *Lancet Neurol*. 2005;4(6):362-365.
